# Supplementary material for: Pre-validation of a MALDI MS proteomics-based method for the reliable detection of blood and blood provenance
Source: Springer Nature journal article supplement (doi:10.1038/s41598-020-74253-z), 2020-10-13
Supplement: MOESM1 [file 41598_2020_74253_MOESM1_ESM.pdf]

## **Pre-validation of a MALDI MS proteomics-based method for the reliable detection of blood and blood provenance**

KENNEDY, Katie, HEATON, Cameron, LANGENBURG, Glenn, COLE, Laura, CLARK, Tom, CLENCH, Malcolm R., SEARS, Vaughn, SEALEY, Mark, MCCOLM, Richard and FRANCESE, Simona <<http://orcid.org/0000-0002-1381-1262>>

Available from Sheffield Hallam University Research Archive (SHURA) at:

<https://shura.shu.ac.uk/27395/>

---

This document is the Supplemental Material

### **Citation:**

KENNEDY, Katie, HEATON, Cameron, LANGENBURG, Glenn, COLE, Laura, CLARK, Tom, CLENCH, Malcolm R., SEARS, Vaughn, SEALEY, Mark, MCCOLM, Richard and FRANCESE, Simona (2020). Pre-validation of a MALDI MS proteomics-based method for the reliable detection of blood and blood provenance. *Scientific Reports*, 10 (1), p. 17087. [Article]

---

### **Copyright and re-use policy**

See <http://shura.shu.ac.uk/information.html>

# **Pre-validation of a MALDI MS proteomics-based method for the reliable detection of blood and blood provenance**

Katherine Kennedy<sup>1#</sup>, Cameron Heaton<sup>1#</sup>, Glenn Langenburg<sup>2</sup>, Laura Cole<sup>1</sup>, Tom Clark<sup>3</sup>, Malcolm R. Clench<sup>1</sup>, Vaughn Sears<sup>4</sup>, Mark Sealey<sup>5</sup>, Richard McColm<sup>5</sup> and Simona Francese<sup>1\*</sup>

<sup>1</sup>Centre for Mass Spectrometry Imaging, Biomolecular Research Centre, Sheffield Hallam University, Sheffield, UK

<sup>2</sup> Elite Forensic Services, LLC, Saint Paul, Minnesota, USA

<sup>3</sup> Sheffield Hallam University, Sheffield, UK

<sup>4</sup>Formerly from CAST, Home Office, St Albans, UK

<sup>5</sup> Defence Science and Technology Laboratories (DSTL), Porton Down, Salisbury, UK

# These authors have equally contributed to the paper.

\* Corresponding author: s.francese@shu.ac.uk

## Tables

| Intravenous BOVINE blood -peptide <i>m/z</i> | Mass accuracy (ppm) | Blind sample 38 (BOVINE) - peptide <i>m/z</i> | Mass accuracy (ppm) |
|----------------------------------------------|---------------------|-----------------------------------------------|---------------------|
| <b>αHB</b> 1071.554                          | 0.6                 | ---                                           |                     |
| <b>αHB</b> 1529.734                          | 0.4                 | ---                                           |                     |
| <b>αHB</b> 1833.892                          | -0.4                | ---                                           |                     |
| <b>βHB</b> 1265.828                          | -2.2                | ---                                           |                     |
| <b>βHB</b> 1274.723                          | -1.9                | <b>βHB</b> 1274.706                           | 15                  |
| <b>βHB</b> 1422.716                          | -7.6                | ---                                           |                     |
| <b>βHB</b> 1477.801                          | -0.7                | ---                                           |                     |
| <b>βHB</b> 1752.898                          | -0.6                | ---                                           |                     |
| <b>βHB</b> 1868.951                          | -1.6                | ---                                           |                     |
|                                              |                     | <b>GAPDH</b> 795.418                          | -3.0                |
|                                              |                     | <b>GAPDH</b> 805.432                          | 1.1                 |
|                                              |                     | <b>GAPDH</b> 1032.595                         | -6.6                |
|                                              |                     | <b>GAPDH</b> 1358.681                         | -9.5                |
|                                              |                     | <b>GAPDH</b> 1369.743                         | -5.5                |
|                                              |                     | <b>GAPDH</b> 1369.743                         | -5.5                |
| <b>GAPDH</b> 1499.776                        | -8.2                |                                               |                     |
|                                              |                     | <b>GAPDH</b> 1499.789                         | -7.2                |
|                                              |                     | <b>GAPDH</b> 1615.880                         | 2.5                 |
|                                              |                     | <b>GAPDH</b> 1763.802                         | 2.5                 |
|                                              |                     | <b>myoglobin</b> 629.343                      | 3.9                 |
|                                              |                     | <b>myoglobin</b> 748.433                      | -3.2                |
|                                              |                     | <b>myoglobin</b> 1271.668                     | 3.8                 |
|                                              |                     | <b>myoglobin</b> 1393.821                     | 3.8                 |
|                                              |                     | <b>myoglobin</b> 1592.838                     | -0.7                |

|                                                      |                            | <b>myoglobin 1669.834</b>                            | -1.3                       |
|------------------------------------------------------|----------------------------|------------------------------------------------------|----------------------------|
| <b>Intravenous PORCINE blood -peptide <i>m/z</i></b> | <b>Mass accuracy (ppm)</b> | <b>Blind sample 7 (PORCINE) - peptide <i>m/z</i></b> | <b>Mass accuracy (ppm)</b> |
| <b>αHB 1041.540</b>                                  | -3.6                       | ---                                                  |                            |
| <b>αHB 1115.631</b>                                  | -10.1                      | ---                                                  |                            |
| <b>αHB 1422.704</b>                                  | -3.2                       | ---                                                  |                            |
| <b>αHB 1628.904</b>                                  | -4.8                       | ---                                                  |                            |
| <b>αHB 1876.893</b>                                  | -2.3                       | ---                                                  |                            |
| <b>αHB 1935.972</b>                                  | -3.2                       | ---                                                  |                            |
| <b>βHB 1265.830</b>                                  | -2.2                       | ---                                                  |                            |
| <b>βHB 1274.726</b>                                  | -1.9                       | ---                                                  |                            |
| <b>βHB 1449.796</b>                                  | -7.6                       | ---                                                  |                            |
| <b>βHB 1866.012</b>                                  | -7.2                       | ---                                                  |                            |
|                                                      |                            | <b>GAPDH 795.422</b>                                 | 4.3                        |
|                                                      |                            | <b>GAPDH 977.547</b>                                 | 5.4                        |
| <b>GAPDH 1499.778</b>                                | 7.4                        |                                                      |                            |
|                                                      |                            | <b>GAPDH 1763.813</b>                                | 6.1                        |
|                                                      |                            | <b>myoglobin 1592.820</b>                            | -11.9                      |

**Table S1.** Putative identification of haemoglobin, glyceraldehyde 3-phosphate hydrogenase (GAPDH) and myoglobin in blind porcine and bovine samples versus the corresponding intravenous blood samples.

Figures

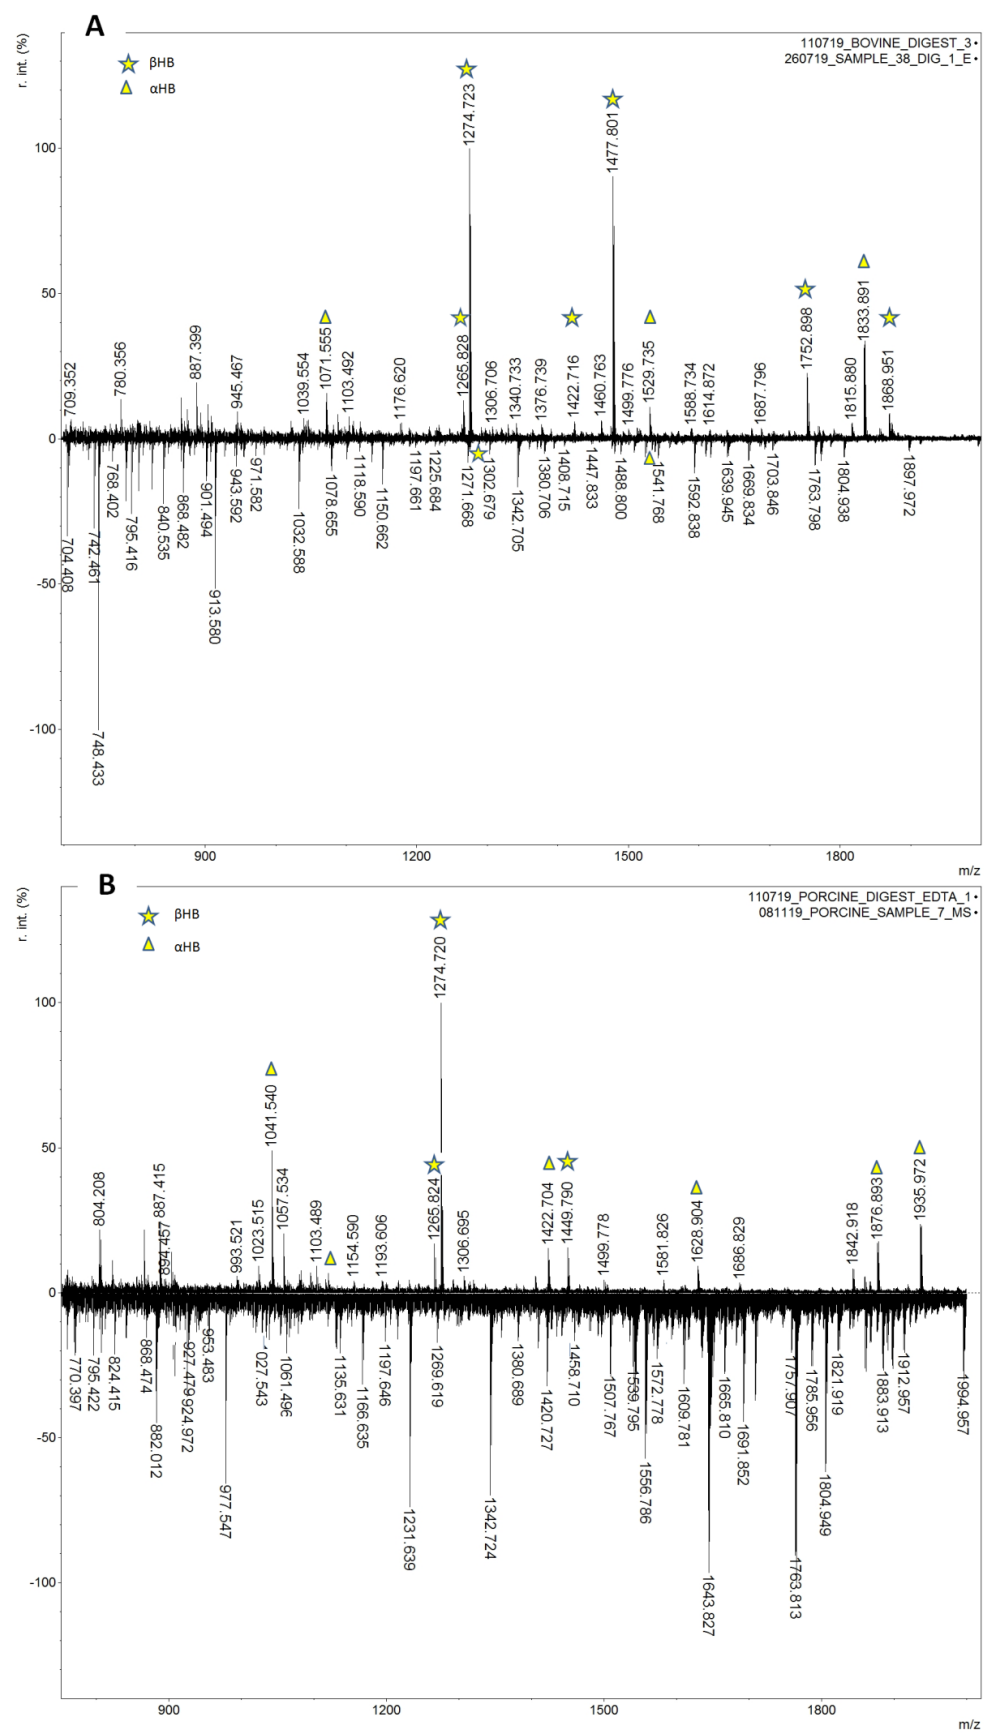

**Fig. S1.** MALDI MS spectral comparison of intravenous reference blood and blind blood samples for bovine (A) and porcine (B). The spectral profiles appear different in both cases with haemoglobin (HB) signals only present in the intravenous samples but not in the blind samples.

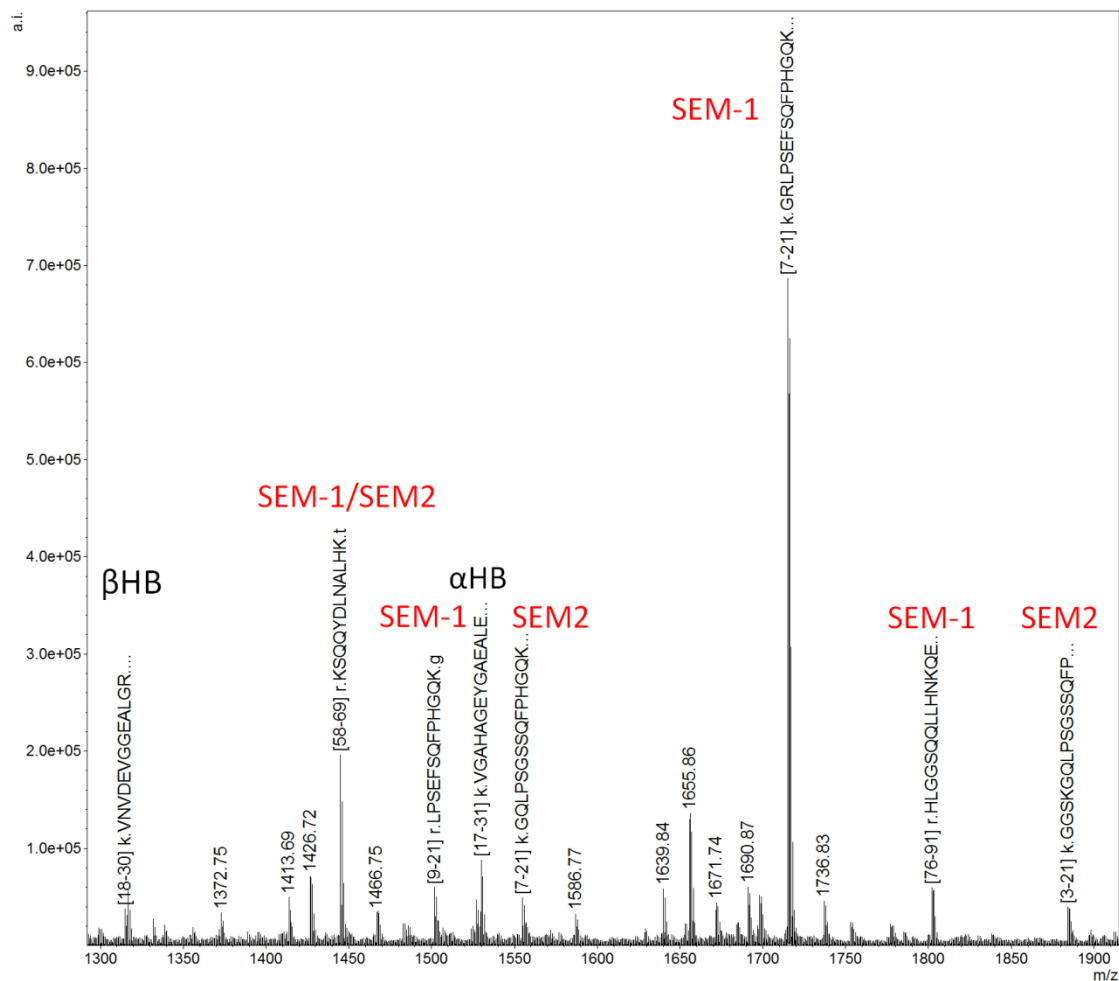

**Fig. S2.** MALDI MS spectrum of blind sample 32 (Semen). Haemoglobin and semenogelin 1 and 2 ion signals were putatively assigned except for  $m/z$  1714.85 which was confirmed by MS/MS.

### Accession numbers list of putatively identified and confirmed proteins

Bovine GAPDH (UniProtKB-P10096)

Bovine Haemoglobin (alpha chain) (UniProtKB - P01966)

Bovine Haemoglobin (beta chain) (UniProtKB - P02070)

Bovine Myoglobin (UniProtKB - P02192)

Chicken GAPDH (UniProtKB- P00356)

Chicken Haemoglobin (alpha chain) (UniProtKB - P01994)

Chicken Haemoglobin (beta chain) (UniProtKB - P02112)

Human Erythrocyte protein band 4.2 (UniProtKB - P16452)

Human Semenogelin -1(UniProtKB - P04279)

Human Semenogelin-2 (UniProtKB - P04279)

Human Haemoglobin (alpha chain) (UniProtKB - P69905)

Human Haemoglobin (beta chain) (UniProtKB - P68871)

Porcine GAPDH (UniProtKB - P00355)

Porcine Haemoglobin (alpha chain) (UniProtKB - P01965)

Porcine Haemoglobin beta chain) (UniProtKB - P02067)

Porcine Myoglobin (UniProtKB - P02189)
