# Supplementary figures and images for: Pre-validation of a MALDI MS proteomics-based method for the reliable detection of blood and blood provenance
Source: Springer Nature journal article supplement (doi:10.1038/s41598-020-74253-z), 2020-10-13

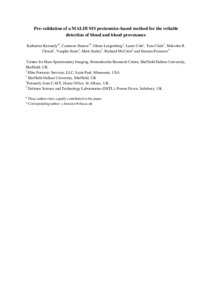

Supplement: MOESM1 [file 41598_2020_74253_MOESM1_ESM.pdf]
